# Supplementary material
Source: PubMed Central journal article supplement (PMC1852778)
Supplement: 7601652s2.pdf [file 7601652s2.pdf]

## Supplementary Figure S2

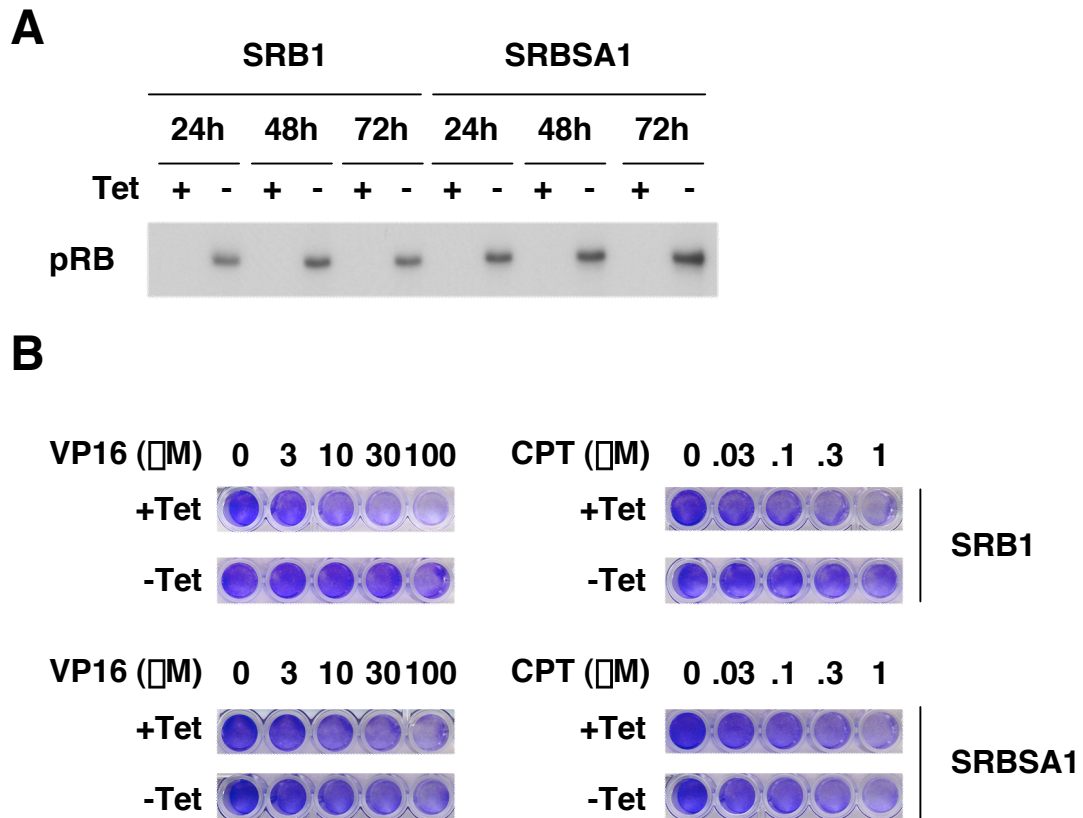

(A) Time course of wild-type pRB and pRB S612A induction. SRB1 cells and SRBSA1 cells were incubated with or without 1 μg/ml of tetracycline (Tet). Cells were harvested at the indicated periods and cell lysates were immunoblotted with anti-pRB antibody.

(B) Images correspond to Figure 4C. Crystal violet stained cells are shown.
