# Supplementary material
Source: PubMed Central journal article supplement (PMC1852778)
Supplement: 7601652s3.pdf [file 7601652s3.pdf]

# Supplementary Figure S3

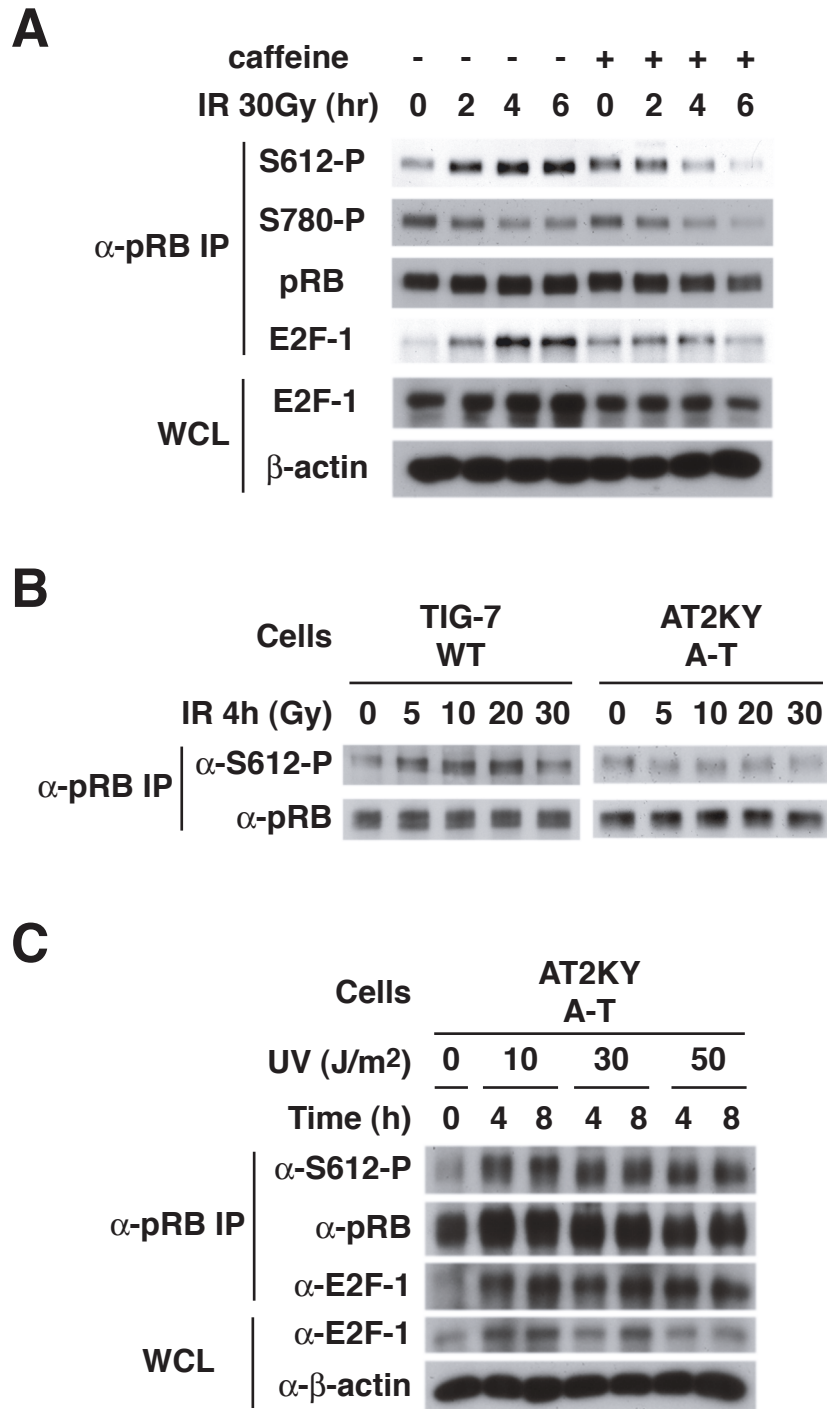

(A) MCF7 cells were pretreated with or without 5mM of caffeine for 1h and subsequently exposed to 30Gy of IR for the indicated periods. Cell lysates were immunoprecipitated with anti-pRB antibody and a Western blot analysis was performed.

(B) Dose-dependent Ser612 phosphorylation of pRB after IR treatment.

(C) Ser612 phosphorylation and pRB-E2F-1 binding were induced after UV treatment in AT2KY cells.
