# Supplementary material
Source: PubMed Central journal article supplement (PMC1852778)
Supplement: 7601652s5.pdf [file 7601652s5.pdf]

# Supplementary Figure S5

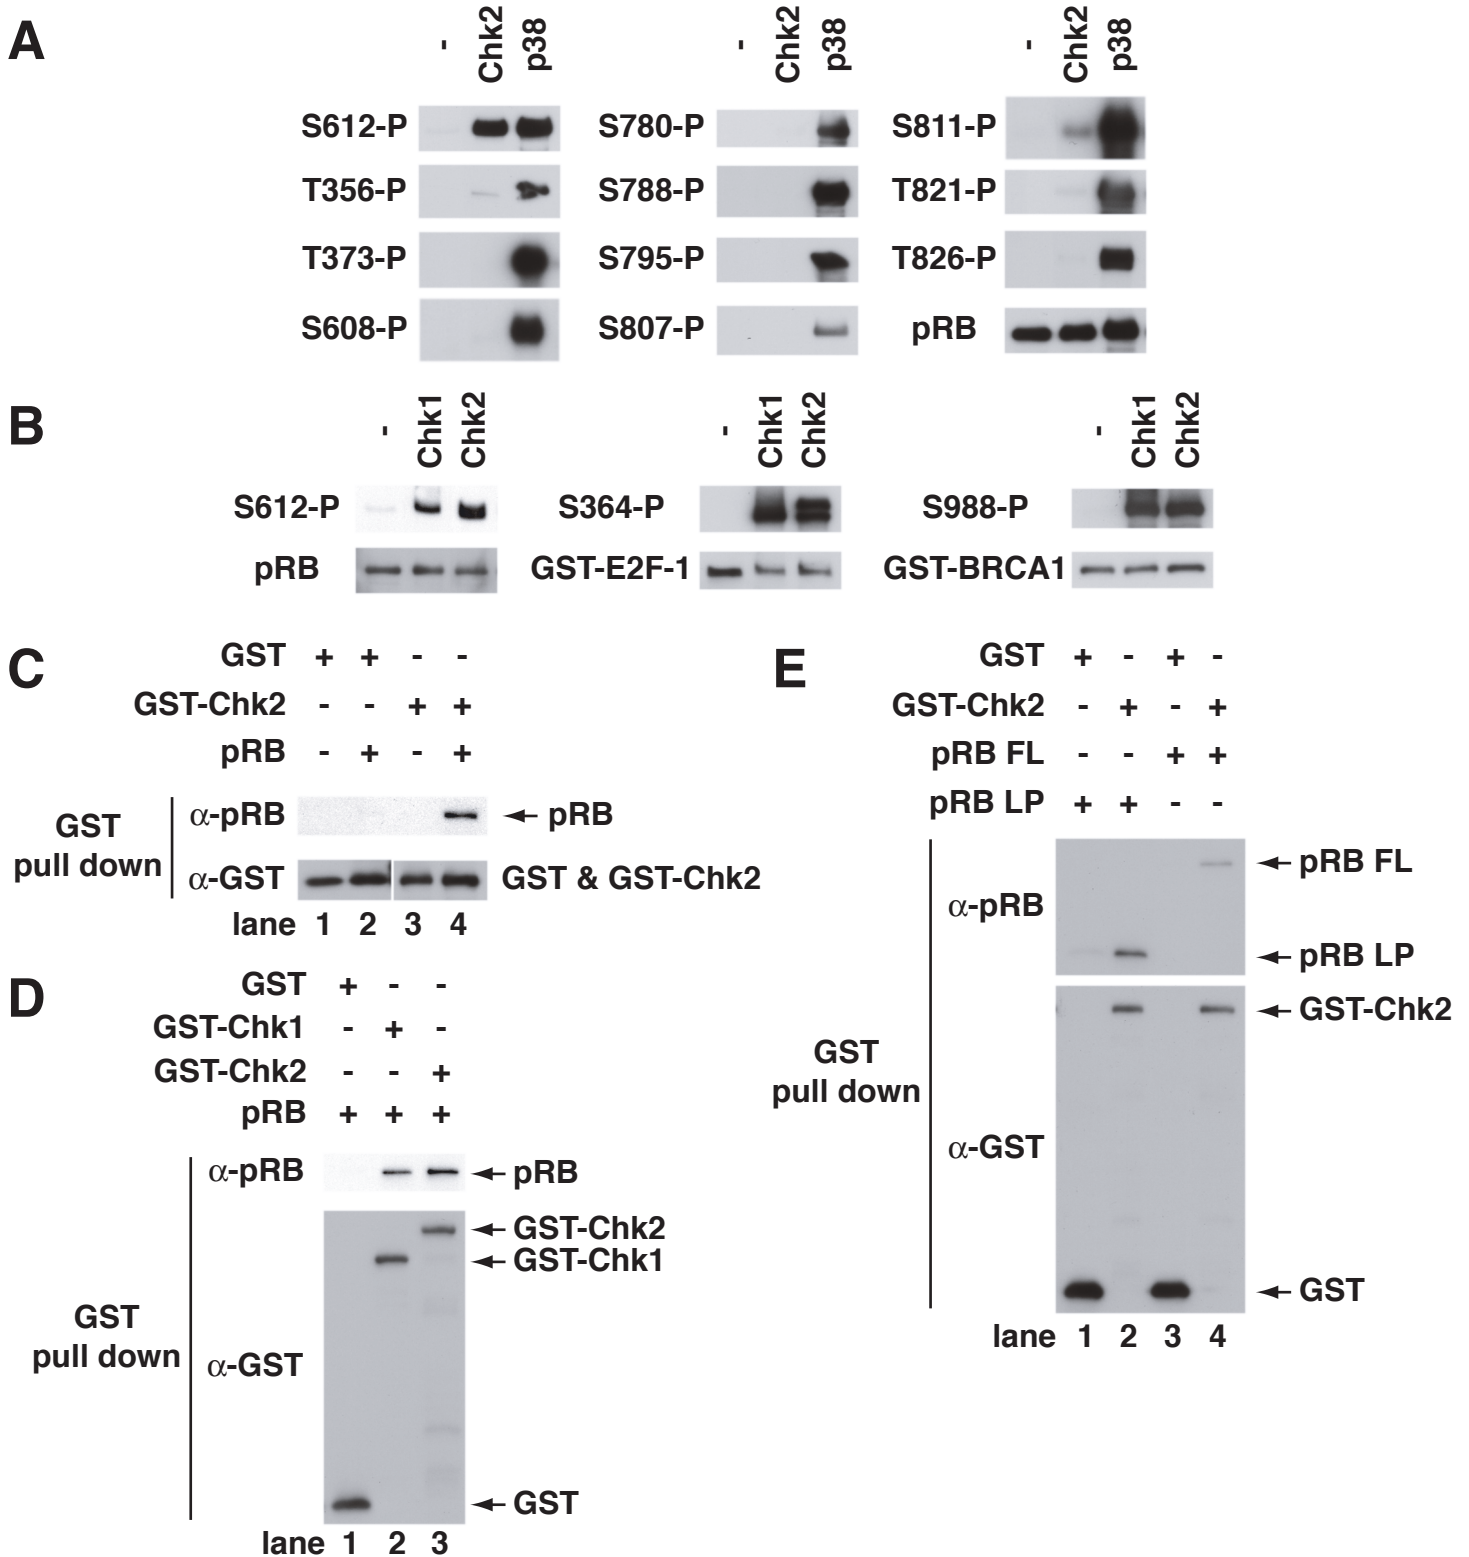

(A) In vitro phosphorylation of Ser612 by Chk2. Recombinant pRB was incubated with Chk2 or p38 $\alpha$  in the presence of ATP. The reaction products were analyzed by immunoblotting using the indicated antibodies.

(B) Chk1 is also able to phosphorylate pRB at Ser612 in vitro. The kinase reaction and Western blotting were performed as in (A).

(C) Chk2 can bind to pRB in vitro.

(D) Chk1 also binds to pRB as well as Chk2 does in vitro.

(E) pRB LP (amino acids 379 to 928) interacts enough with Chk2 in vitro.
