# Supplementary material
Source: PubMed Central journal article supplement (PMC1852778)
Supplement: 7601652s6.pdf [file 7601652s6.pdf]

## Supplementary Figure S6

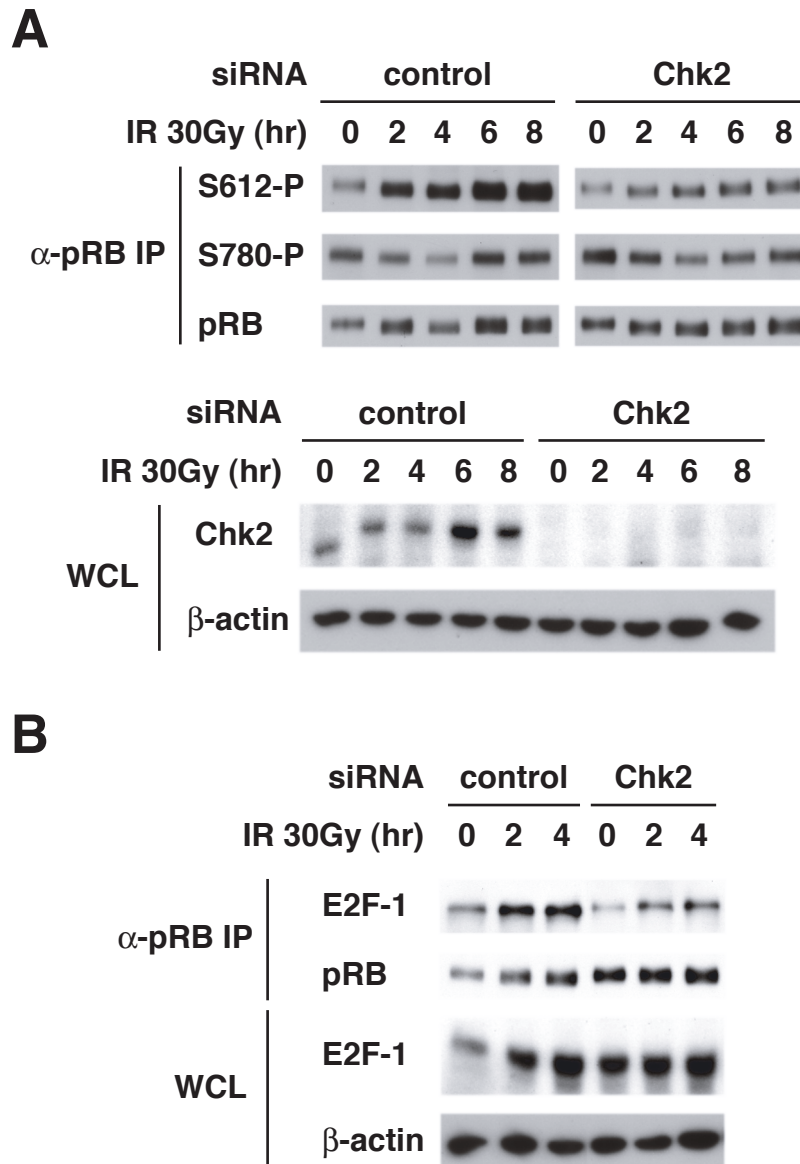

**Silencing of Chk2 by siRNA decreases the phosphorylation at Ser612 and binding of pRB to E2F-1 after DNA damage.**

(A) Reduction of Chk2 by siRNA decreases phosphorylation at Ser612 after DNA damage. MCF7 cells were transfected with control siRNA or Chk2 siRNA for 48h, and exposed to 30Gy of IR for the indicated periods. Cell lysates were immunoprecipitated with anti-pRB antibody and a Western blot analysis was performed.

(B) Reduction of Chk2 by siRNA decreases the binding of pRB to E2F-1 after DNA damage. Immunoprecipitation and Western blotting were performed as in (A).
